# Supplementary material
Source: MDPI journal article supplement (https://www.mdpi.com/2075-4701/12/8/1355)
Supplement: s1 [file s1]

# Intriguing Prospects of a Novel Magnetic Nanohybrid Material: Ferromagnetic Fe-Rh Nanoparticles Grown on Nanodiamonds

Panagiotis Ziogas <sup>1</sup>, Athanasios B. Bourlinos <sup>1</sup>, Polyxeni Chatzopoulou <sup>2</sup>, George P. Dimitrakopoulos <sup>2</sup>, Thomas Kehagias <sup>2</sup>, Anastasios Markou <sup>3</sup> and Alexios P. Douvalis <sup>1,4\*</sup>

<sup>1</sup> Physics Department, University of Ioannina, 45110 Ioannina, Greece

<sup>2</sup> Physics Department, Aristotle University of Thessaloniki, 54124 Thessaloniki, Greece

<sup>3</sup> Department of Solid State Chemistry, Max Planck Institute for Chemical Physics of Solids, 01187 Dresden, Germany

<sup>4</sup> Institute of Materials Science and Computing, University Research Center of Ioannina (URCI), 45110 Ioannina, Greece

\* Correspondence: adouval@uoi.gr

## Supplementary Materials (SM)

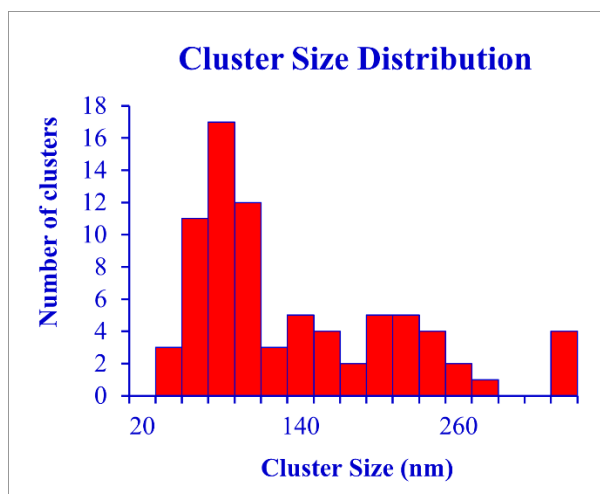

**Figure S1.** Histogram of the NDs' nanotemplate clusters size distribution appearing in the FeRh-AM-ND sample measured from TEM.

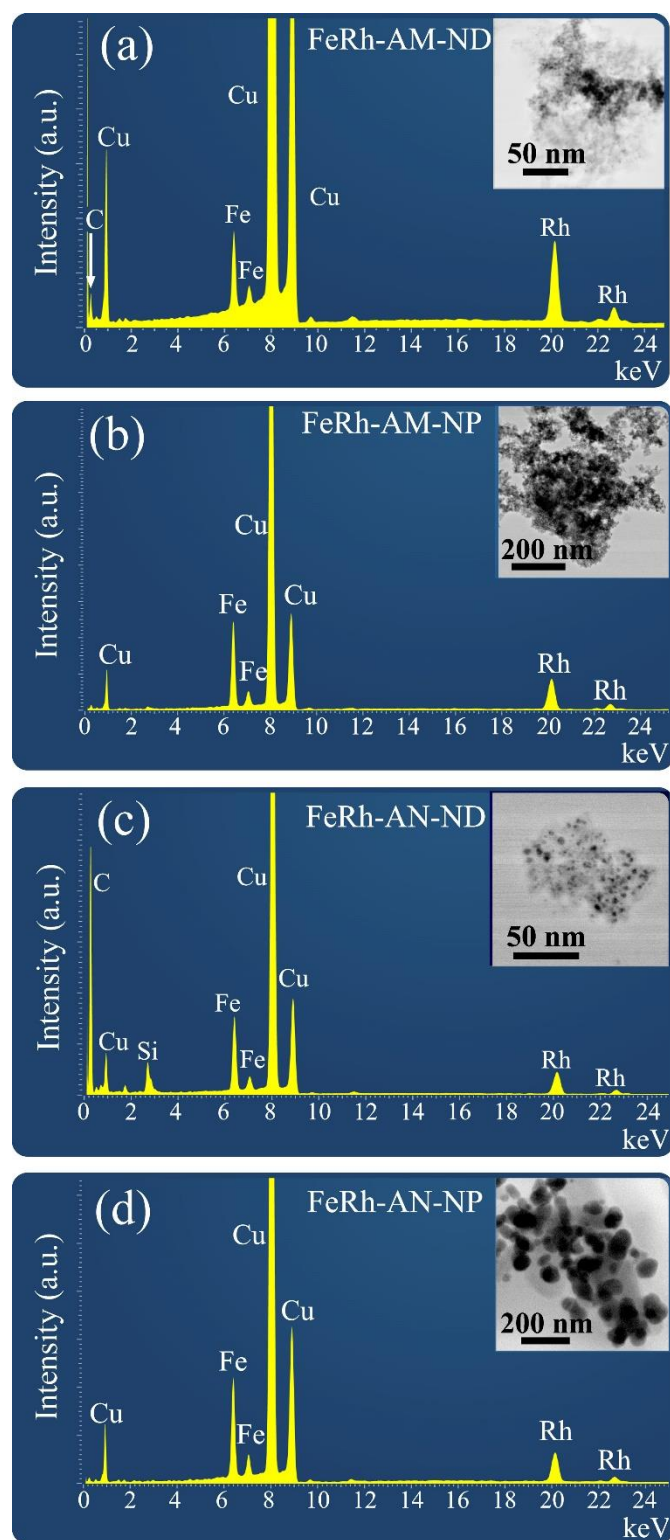

**Figure S2.** Overall EDS spectra, collected from the regions presented as insets. Sample tags are included in each spectrum. The Fe at% composition of the FeRh metallic alloys was calculated from the respective  $K_{\alpha}$  peaks to be: before the annealing 10% in (a) and 23% in (b) and, after the annealing, 37% in (c), and 27% in (d). Cu peaks are due to the TEM supporting grids. In sample FeRh-AN-ND (c), the Si peak is attributed to contamination from the quartz ampule during the annealing.

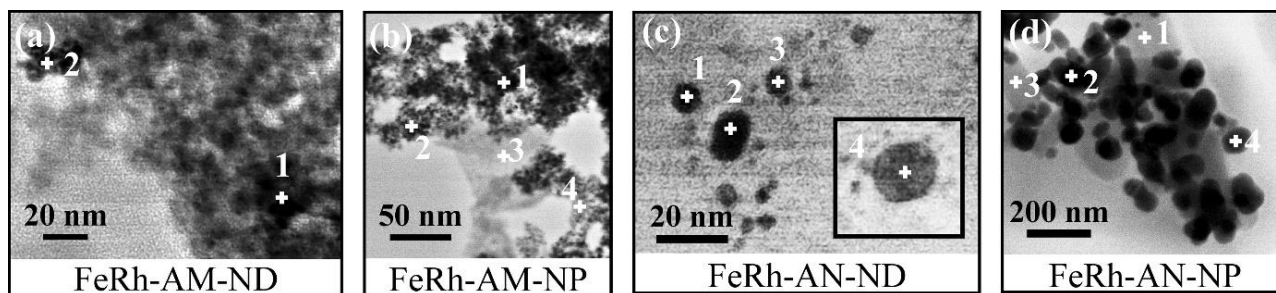

**Figure S3.** Indicative BF STEM images from all samples showing positions where EDS point analysis was performed. The corresponding measurements are given in Table S1.

**Table S1.** Fe at% composition (relative to Rh at%) of the FeRh metallic alloy calculated from the  $K_{\alpha}$  peaks of point-spectra acquired from the points marked in Figure S3.

| a. FeRh-AM-ND |        | b. FeRh-AM-NP |        | c. FeRh-AN-ND |        | d. FeRh-AN-NP |        |
|---------------|--------|---------------|--------|---------------|--------|---------------|--------|
| Spot          | Fe %at |
| 1             | 23     | 1             | 9      | 1             | 22     | 1             | 100    |
| 2             | 12     | 2             | 14     | 2             | 23     | 2             | 17     |
|               |        | 3             | 41     | 3             | 23     | 3             | 100    |
|               |        | 4             | 15     | 4             | 29     | 4             | 8      |

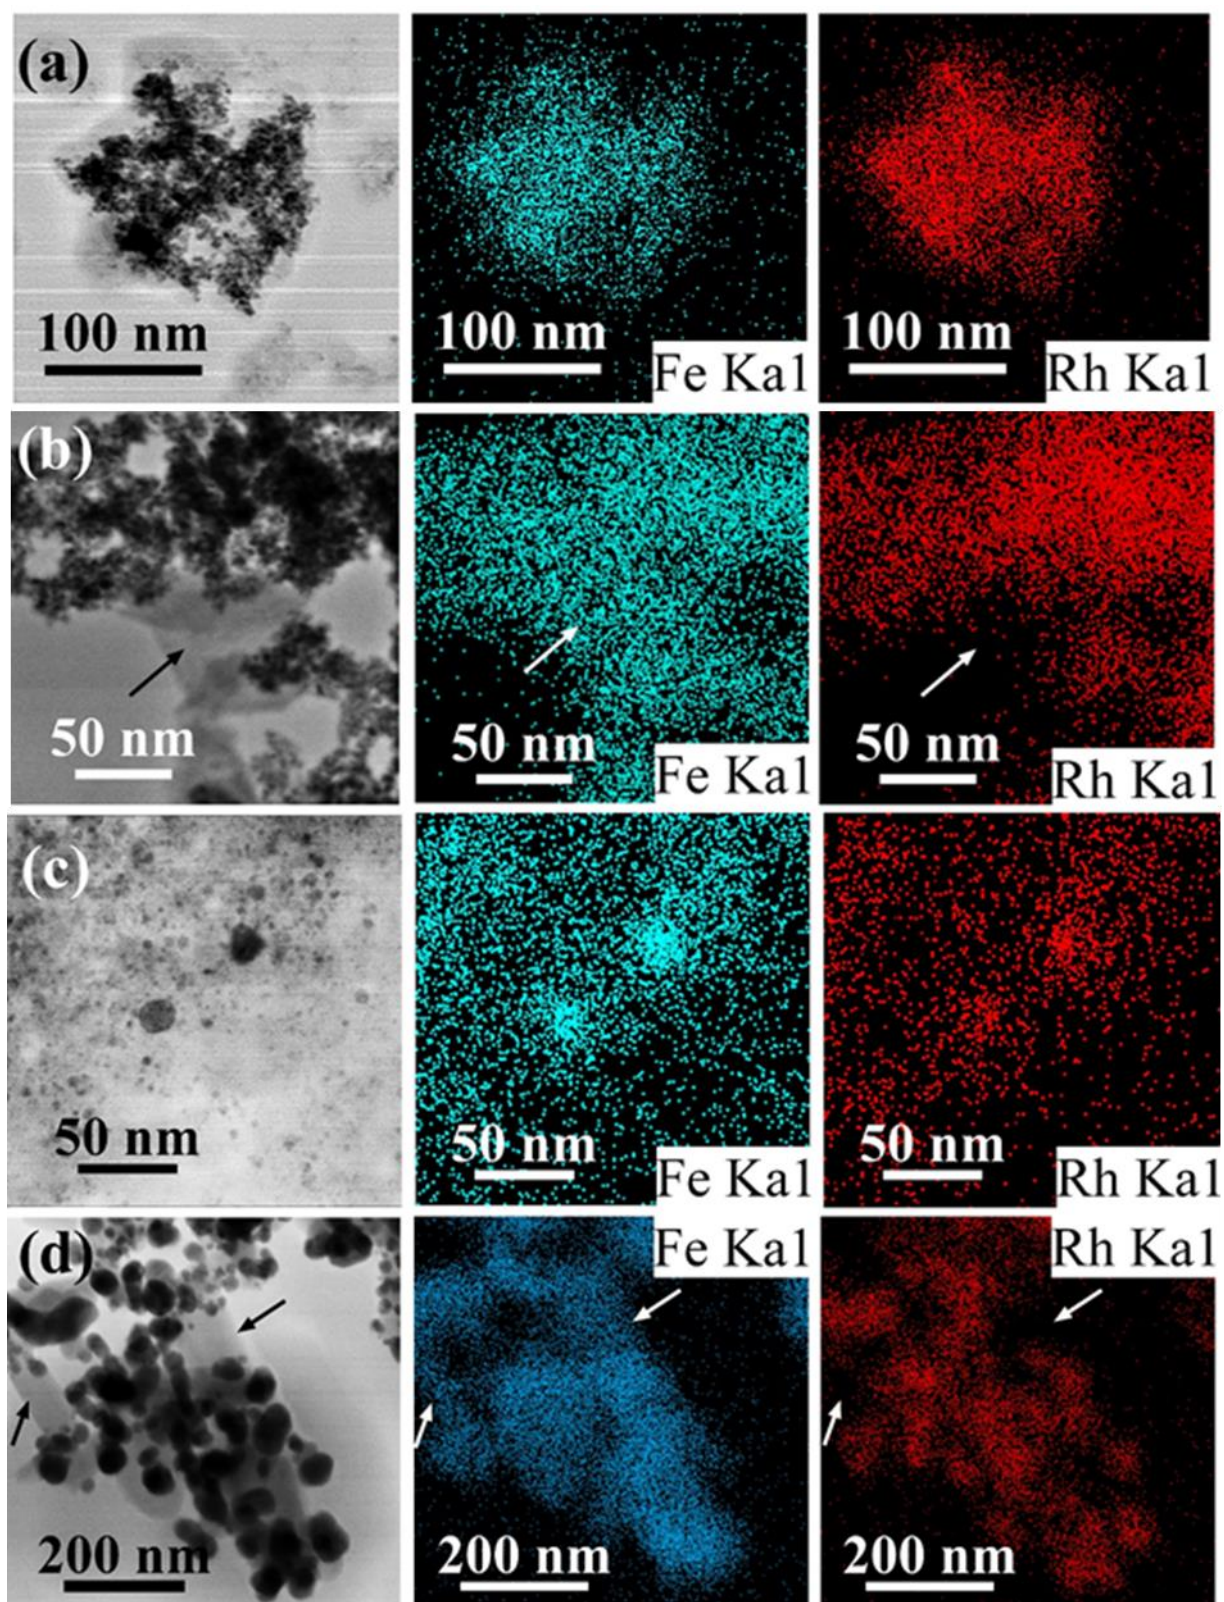

**Figure S4.** EDS Fe and Rh elemental maps obtained from samples (a) FeRh-AM-ND, (b) FeRh-AM-NP, (c) FeRh-AN-ND and (d) FeRh-AN-NP. Arrows in the unsupported free NP samples, i.e. (b) and (d), point at Fe-rich platelets, possibly connected to IOs and IOBs.



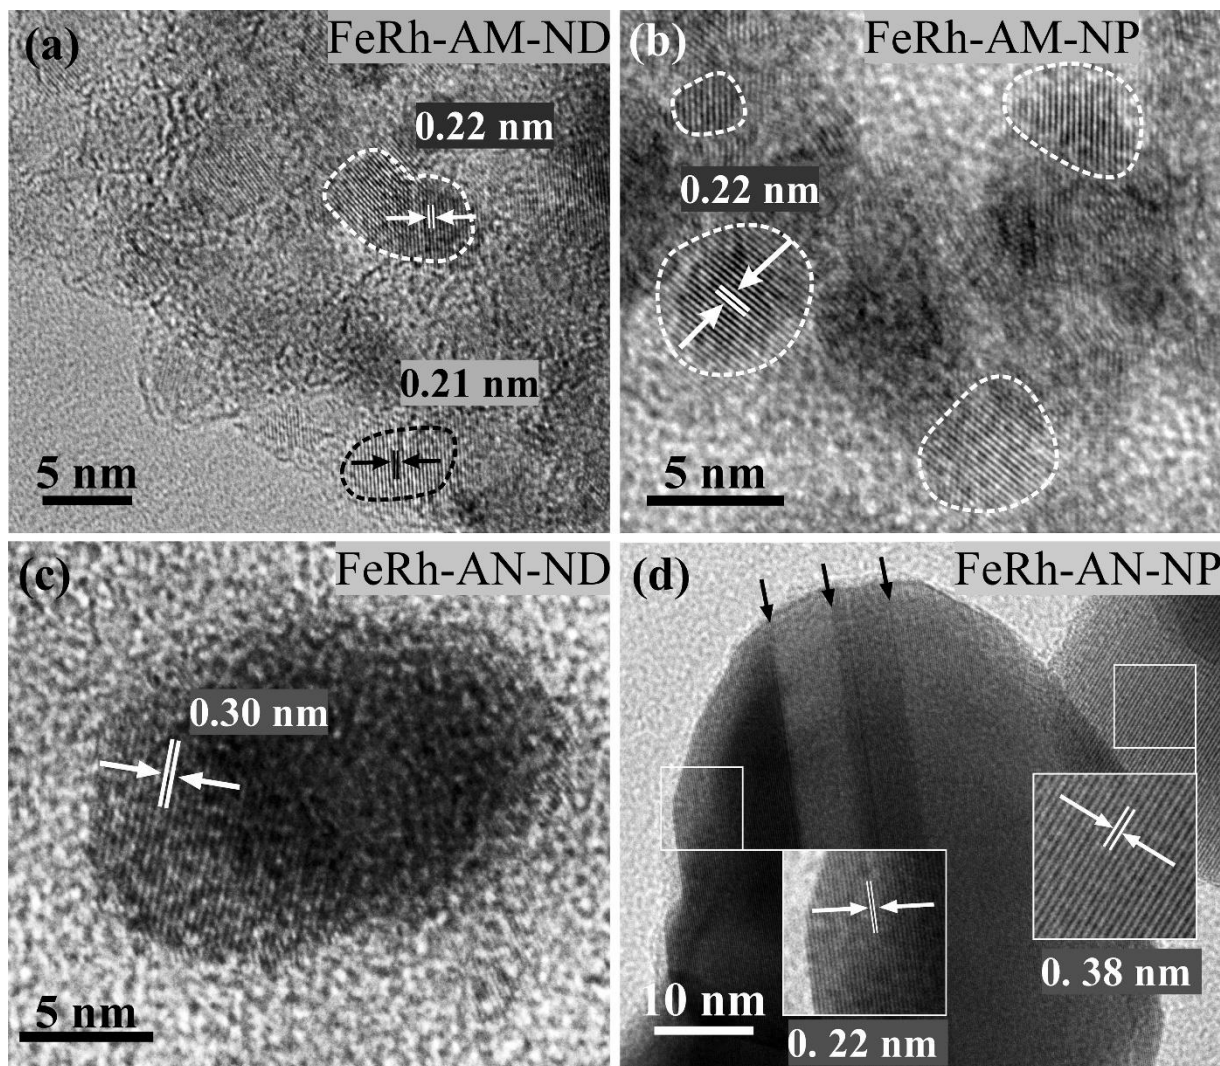

**Figure S5.** HRTEM images from samples (a) FeRh-AM-ND, (b) FeRh-AM-NP, (c) FeRh-AN-ND and (d) FeRh-AN-NP. In (a) and (b), {111}-lattice fringes measured at  $\sim 0.22$  nm periodicity are shown in white, from fcc elemental Rh or Rh-rich  $\gamma$ -FeRh alloy NPs. In (a), ND {111}-lattice fringes with similar periodicity are shown in black (due to their similar {111}  $d$ -spacing, NPs and NDs are differentiated based on absorption contrast). In (c), {100}-lattice fringes of the CsCl-type  $\alpha'$ -FeRh phase of a metallic NP after the annealing process, with  $\sim 0.30$  nm spacing, are illustrated. In (d), Fe-Rh {111}-lattice fringes with spacing  $\sim 0.22$  nm are measured in a spherical NP that exhibits twinning (black arrows), as well as lattice fringes of  $\sim 0.38$  nm spacing in another NP, attributed to the {220} planes of iron oxyborate  $\text{Fe}_3\text{BO}_5$ .

Note: In NPs commonly their close-packed planes are resolved by HRTEM. In this case, the interplanar  $d$ -spacing of such planes are: For the {111} planes of ND,  $d_{\{111\}\text{-ND}} = 0.206$  nm, for the {111} planes of the FeRh fcc metallic phase  $d_{\{111\}\text{-FCC}} = 0.216$  nm, and for the {110} planes of the bcc phase  $d_{\{110\}\text{-BCC}} = 0.212$  nm. The close-packed planes of the metallic fcc and bcc phases are hardly discriminated within the spatial resolution of our camera. As a result, the bcc phase can only become discriminated if such a NP is oriented so that other crystal planes are diffracting that are characteristic of the bcc phase only. Since only the {100} and the {110} planes of this phase have  $d$ -spacings greater than the resolution limit of our microscope, the {100} planes are the only other choice. Hence, we illustrated in Fig. S5(c) an image of a NP with {100} planes (nominal  $d$ -spacing 0.2993 nm). Such a  $d$ -spacing does not exist in either the ND or the FCC phase.

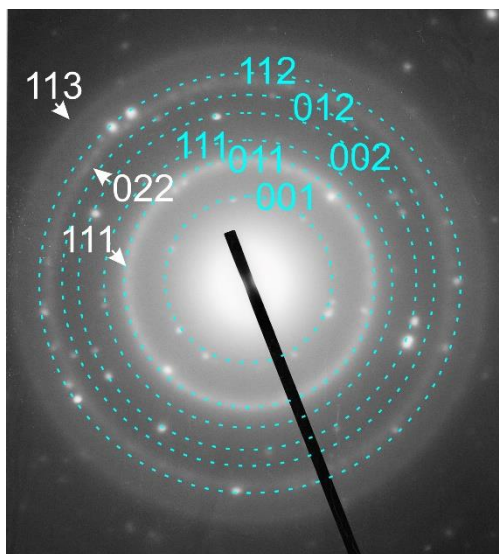

**Figure S6.** Electron diffraction pattern obtained from an area comprising larger NPs in sample FeRh-AN-ND. Arrows and white letters denote the Miller indices of rings from nanodiamond. Cyan letters and dashed circles denote respectively Miller indices and corresponding locations of reflections coming from the bcc  $\alpha'$ -FeRh phase.

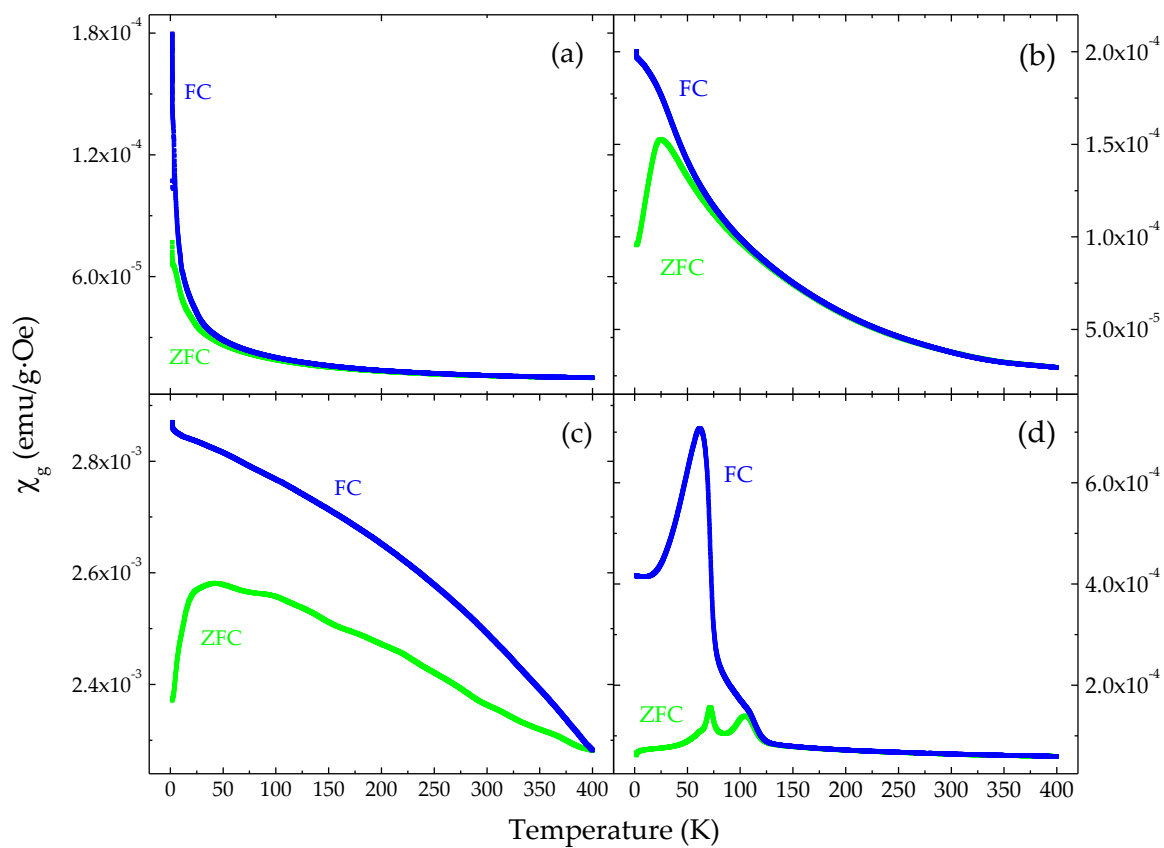

**Figure S7.** Mass magnetic susceptibility versus temperature measurements of the FeRh-AM-ND (a), FeRh-AM-NP (b), FeRh-AN-ND (c) and FeRh-AN-NP (d) samples measured under an applied external magnetic field of 999 Oe following ZFC (green) and FC (blue) modes.

**Table S2.** Mössbauer hyperfine parameters as resulting from the best fits of the corresponding spectra of the samples recorded at 77 K and 11 K. IS is the isomer shift (given relative to  $\alpha$ -Fe at 300 K),  $\Gamma/2$  is the half line-width, QS is the quadrupole splitting,  $2\epsilon$  is the quadrupole shift,  $B_{\text{hf}}$  is the hyperfine magnetic field,  $\Delta B_{\text{hf}}$  or  $\Delta QS$  is the spreading of QS and  $\Delta B_{\text{hf}}$  is the spreading of  $B_{\text{hf}}$  around the central  $QS^{(\text{C})}$  or  $B_{\text{hf}}^{(\text{C})}$  values respectively (when these parameters are used) and AA is the relative spectral absorption area of each component used to fit the spectra. Typical errors are  $\pm 0.02$  mm/s for IS,  $\Gamma/2$ ,  $2\epsilon$  and QS,  $\pm 3$  kOe for  $B_{\text{hf}}$  and  $\pm 5\%$  for AA. In the cases where two  $\Delta B_{\text{hf}}$  values are given, they correspond to asymmetric spreading around (lower/higher) the  $B_{\text{hf}}^{(\text{C})}$  value.

| T  | Sample     | IS   | $\Gamma/2$ | $QS^{(\text{C})}$<br>or $2\epsilon$ | $B_{\text{hf}}^{(\text{C})}$ | $\Delta B_{\text{hf}}$ or<br>$\Delta QS$ | AA  | Site - Phase                                         | Color   |
|----|------------|------|------------|-------------------------------------|------------------------------|------------------------------------------|-----|------------------------------------------------------|---------|
| K  |            | mm/s | mm/s       | mm/s                                | kOe                          | (kOe or<br>mm/s)                         | %   |                                                      |         |
| 77 | FeRh-AM-ND | 0.47 | 0.22       | 0.88                                | 0                            | 0.23                                     | 100 | $\text{Fe}^{3+}$ - IO/IHO (SPM)                      | Black   |
|    | FeRh-AM-NP | 0.48 | 0.22       | 0.89                                | 0                            | 0.25                                     | 100 | $\text{Fe}^{3+}$ - IO/IHO (SPM)                      | Black   |
|    | FeRh-AN-ND | 0.03 | 0.14       | -0.02                               | 273                          | 0                                        | 45  | Fe - bcc B2 $\alpha'$ -FeRh                          | Blue    |
|    |            | 0.03 | 0.14       | 0.00                                | 0                            | 0                                        | 4   | Fe - bcc B2 $\alpha'$ -FeRh (SPM)                    | Cyan    |
|    |            | 0.38 | 0.35       | 0.76                                | 0                            | 0                                        | 51  | $\text{Fe}^{3+}$ - IO/IHO (SPM)                      | Red     |
|    | FeRh-AN-NP | 0.23 | 0.22       | 0.00                                | 0                            | 0                                        | 27  | Fe - fcc FeRh                                        | Orange  |
|    |            | 1.23 | 0.19       | 2.22                                | 0                            | 0                                        | 10  | $\text{Fe}^{2+}$ - $\text{Fe}_3\text{BO}_5$          | Olive   |
|    |            | 1.30 | 0.19       | 3.03                                | 0                            | 0                                        | 11  | $\text{Fe}^{2+}$ - $\text{Fe}_3\text{BO}_6$          | Olive   |
|    |            | 0.66 | 0.17       | 0.91                                | 0                            | 0                                        | 3   | $\text{Fe}^{2,\text{v}+}$ - $\text{Fe}_3\text{BO}_7$ | Olive   |
|    |            | 1.23 | 0.19       | 2.19                                | 47                           | 0                                        | 20  | $\text{Fe}^{2+}$ - $\text{Fe}_3\text{BO}_5$          | Olive   |
|    |            | 0.52 | 0.19       | 0.82                                | 323                          | 0                                        | 10  | $\text{Fe}^{3+}$ - $\text{Fe}_3\text{BO}_5$          | Olive   |
|    |            | 0.87 | 0.19       | 1.36                                | 347                          | 0                                        | 9   | $\text{Fe}^{2.5+}$ - $\text{Fe}_3\text{BO}_5$        | Olive   |
|    |            | 0.81 | 0.19       | 1.12                                | 399                          | 0                                        | 10  | $\text{Fe}^{2.5+}$ - $\text{Fe}_3\text{BO}_5$        | Olive   |
| 11 | FeRh-AM-ND | 0.47 | 0.20       | 0.90                                | 0                            | 0                                        | 49  | $\text{Fe}^{3+}$ - IO/IHO (SPM)                      | Red     |
|    |            | 0.47 | 0.16       | -0.01                               | 487                          | 17                                       | 7   | $\text{Fe}^{3+}$ - IO/IHO                            | Orange  |
|    |            | 0.47 | 0.16       | 0.01                                | 420                          | 57                                       | 19  | $\text{Fe}^{3+}$ - IO/IHO                            | Magenta |
|    |            | 0.47 | 0.21       | 0.01                                | 261                          | 164                                      | 25  | $\text{Fe}^{3+}$ - IO/IHO                            | Brown   |
|    | FeRh-AM-NP | 0.50 | 0.31       | -0.03                               | 488                          | 12/4                                     | 30  | $\text{Fe}^{3+}$ - IO/IHO                            | Brown   |
|    |            | 0.50 | 0.28       | -0.03                               | 449                          | 24/6                                     | 50  | $\text{Fe}^{3+}$ - IO/IHO                            | Magenta |
|    |            | 0.50 | 0.14       | -0.03                               | 360                          | 135/12                                   | 20  | $\text{Fe}^{3+}$ - IO/IHO                            | Orange  |
|    | FeRh-AN-ND | 0.15 | 0.22       | 0.01                                | 294                          | 0                                        | 58  | Fe - bcc B2 $\alpha'$ -FeRh                          | Blue    |
|    |            | 0.15 | 0.17       | 0.00                                | 0                            | 0                                        | 4   | Fe - bcc B2 $\alpha'$ -FeRh (SPM)                    | Cyan    |
|    |            | 0.49 | 0.44       | 0.86                                | 0                            | 0                                        | 38  | $\text{Fe}^{3+}$ - IO/IHO (SPM)                      | Red     |
|    | FeRh-AN-NP | 0.26 | 0.21       | 0.00                                | 181                          | 20                                       | 34  | Fe - fcc FeRh                                        | Orange  |
|    |            | 1.24 | 0.17       | 2.10                                | 94                           | 0                                        | 7   | $\text{Fe}^{2+}$ - $\text{Fe}_3\text{BO}_5$          | Olive   |
|    |            | 1.24 | 0.17       | 2.15                                | 249                          | 0                                        | 10  | $\text{Fe}^{2+}$ - $\text{Fe}_3\text{BO}_8$          | Olive   |
|    |            | 1.24 | 0.17       | 2.15                                | 205                          | 0                                        | 5   | $\text{Fe}^{2+}$ - $\text{Fe}_3\text{BO}_8$          | Olive   |
|    |            | 1.31 | 0.31       | 3.03                                | 161                          | 0                                        | 11  | $\text{Fe}^{2+}$ - $\text{Fe}_3\text{BO}_8$          | Olive   |
|    |            | 0.53 | 0.17       | 0.82                                | 491                          | 0                                        | 10  | $\text{Fe}^{3+}$ - $\text{Fe}_3\text{BO}_5$          | Olive   |
|    |            | 0.82 | 0.17       | 1.14                                | 515                          | 0                                        | 5   | $\text{Fe}^{2.5+}$ - $\text{Fe}_3\text{BO}_5$        | Olive   |
|    |            | 0.82 | 0.17       | 1.14                                | 474                          | 0                                        | 6   | $\text{Fe}^{2.5+}$ - $\text{Fe}_3\text{BO}_3$        | Olive   |
|    |            | 0.88 | 0.17       | 1.36                                | 432                          | 0                                        | 6   | $\text{Fe}^{2.5+}$ - $\text{Fe}_3\text{BO}_4$        | Olive   |
|    |            | 0.88 | 0.17       | 1.36                                | 416                          | 0                                        | 4   | $\text{Fe}^{2.5+}$ - $\text{Fe}_3\text{BO}_5$        | Olive   |
|    |            | 0.69 | 0.17       | 0.93                                | 414                          | 0                                        | 2   | $\text{Fe}^{2,\text{v}+}$ - $\text{Fe}_3\text{BO}_5$ | Olive   |
